# Supplementary material
Source: MDPI journal article supplement (https://www.mdpi.com/2071-1050/12/15/5934)
Supplement: s1 [file s1]

**Table S1.** List of variables used to characterize the four studied communities. The *First-* and *Second-* tier variables are standard in the literature, but the indicator variables were developed specifically for this study.

| <i>First-tier variable</i>                                                                       | <i>Second-tier diagnostic variables</i> | <i>Indicator variables</i>                                                                                                                         |
|--------------------------------------------------------------------------------------------------|-----------------------------------------|----------------------------------------------------------------------------------------------------------------------------------------------------|
| <b>Social, economic, and political settings (S) :</b>                                            | S1 – Economic development               | <b>S1a</b> - Cocoa production activity supported by provincial government                                                                          |
|                                                                                                  | S2 – Demographic trends                 | <b>S2a</b> - Population growth rate in Amazonian indigenous communities                                                                            |
|                                                                                                  | S3 – Political stability                | <b>S3a</b> - Provincial government actions in accord with national policies.                                                                       |
|                                                                                                  | S4 – Other governance systems           | <b>S4a</b> - Presence of community-based organizations                                                                                             |
|                                                                                                  | S5 – Markets                            | <b>S5a</b> - Access to national and international markets                                                                                          |
|                                                                                                  | S6 – Media organizations                | <b>S6a</b> - Support or interest in cocoa production activities and socio-environmental projects                                                   |
|                                                                                                  | S7 – Technology                         | <b>S7a</b> - Climate alerts systems<br><b>S7b</b> - Level of infrastructure development (cocoa transformation facilities)                          |
| Resource systems (RS): <b>Agricultural land use in Amazonian rainforest - Pumayacu community</b> | RS1 – Sector : Amazonian rainforests    | RS1a - Land availability for agricultural activities                                                                                               |
|                                                                                                  | RS2 – Clarity of system boundaries      | RS2a - Anthropogenic (political) boundaries<br>RS2b - Natural boundaries                                                                           |
|                                                                                                  | RS3 – Size of resource system           | RS3a - Pressure on land use                                                                                                                        |
|                                                                                                  | RS4 – Human-constructed facilities      | RS4a - Roads to take their products out to markets<br>RS4b - Infrastructure to access agricultural lands                                           |
|                                                                                                  | RS5 – Productivity of system            | RS5a - Suitable land for cocoa production                                                                                                          |
|                                                                                                  | RS6 – Equilibrium properties            | RS6a - Interaction between subsystems: fisheries, water provisions, cattle, fish farming, forest exploitations, ...                                |
|                                                                                                  | RS7 – Predictability of system dynamics | RS7a - Cocoa production in the same periods of the year                                                                                            |
|                                                                                                  | RS8 – Storage characteristics           | RS8a - Drying and fermenting cocoa centers (post-harvest process) in the community                                                                 |
|                                                                                                  | RS9 – Location                          | RS9a - Buffer or expansion zones (communal reserve lands)                                                                                          |
| Governance systems (GS): <b>Pumayacu Kichwa community</b>                                        | GS1 – Government organizations          | GS1a - Presence or proximity to government (central and regional) representatives<br>GS1b - Presence or proximity to community-based organizations |
|                                                                                                  | GS2 – Nongovernment organizations       | GS2a - Presence of NGOs and international cooperation agencies                                                                                     |
|                                                                                                  | GS3 – Network structure                 | GS3a - Presence or proximity to commercial actors who purchase cocoa production                                                                    |
|                                                                                                  | GS4 – Property-rights systems           | GS4a - Communal property right system                                                                                                              |
|                                                                                                  | GS5 – Operational-choice rules          | GS5a - Existence of rules and formal guidelines of cocoa production                                                                                |
|                                                                                                  | GS6 – Collective-choice rules           | GS6a - Control committees in cocoa production                                                                                                      |
|                                                                                                  | GS7 – Constitutional-choice rules       | GS7a - Membership (voice and vote) from cocoa small producers association                                                                          |
|                                                                                                  | GS8 – Monitoring and sanctioning rules  | GS8a - Control and monitoring agreements for cocoa certification process                                                                           |

|                                                              |                                                                                              | GS8b - Internal sanctioning agreements over cocoa certification process                                                                                                     |
|--------------------------------------------------------------|----------------------------------------------------------------------------------------------|-----------------------------------------------------------------------------------------------------------------------------------------------------------------------------|
| Resource units (RU):<br><b>Nacional Cacao production</b>     | RU1 – Resource unit mobility                                                                 | RU1a - Control over cocoa seeds exchange within other actors                                                                                                                |
|                                                              | RU2 – Growth or replacement rate                                                             | RU2a - Growth or replacement rate of <i>Nacional</i> cocoa tree                                                                                                             |
|                                                              | RU3 – Interaction among resource units                                                       | RU3a - Cocoa production use of the available arable land                                                                                                                    |
|                                                              | RU4 – Economic value                                                                         | RU4a - Difference in economic value of <i>Nacional</i> (organic) cocoa compared to ordinary cocoa                                                                           |
|                                                              | RU5 – Number of units                                                                        | RU5a - <i>Nacional</i> cocoa trees per hectare: > or < 1000 trees/hectare                                                                                                   |
|                                                              | RU6 – Distinctive characteristics                                                            | RU6a - Presence of <i>Nacional</i> cacao enhanced clones                                                                                                                    |
|                                                              |                                                                                              | RU6b - Presence of <i>Criollo</i> and other native cocoa species like white cocoa ( <i>Theobroma bicolor</i> ) and wild cocoa trees ( <i>Herrania spp.</i> ) in plantations |
|                                                              | RU7 – Spatial and temporal distribution                                                      | RU6c - Presence of cocoa clone CCN51 in plantations                                                                                                                         |
| RU8 - Subtractability                                        | RU7a - Homogeneity of <i>Nacional</i> cocoa production in the community's agricultural lands |                                                                                                                                                                             |
|                                                              |                                                                                              | RU8a - Rules of use to extract cocoa seeds                                                                                                                                  |
| Actors (A):<br><b>Indigenous Communities</b>                 | A1 – Number of relevant actors                                                               | A1a - Well-organized directive                                                                                                                                              |
|                                                              | A2 – Socioeconomic attributes                                                                | A1b - Delegation of power                                                                                                                                                   |
|                                                              |                                                                                              | A2a - Socioeconomic attributes                                                                                                                                              |
|                                                              | A3 – History or past experiences                                                             | A3a - Traditional uses and culture development of cacao in the community                                                                                                    |
|                                                              |                                                                                              | A3b - Occupation of ancestral territories                                                                                                                                   |
|                                                              | A4 – Location                                                                                | A4a - Access and proximity to markets                                                                                                                                       |
|                                                              | A5 – Leadership/entrepreneurship                                                             | A5a - Collective support for Leadership/entrepreneurship                                                                                                                    |
|                                                              | A6 – Norms (trust-reciprocity)/social capital                                                | A6a - Respect to ancient communities values                                                                                                                                 |
|                                                              |                                                                                              | A7a – Knowledge of ‘El niño’ and ‘La niña’ effects over their production                                                                                                    |
| A7 – Knowledge of SES/mental models                          | A7b - Clarity and understanding of the certification processes                               |                                                                                                                                                                             |
| A8 – Importance of resource (dependence)                     | A8a - Cocoa production considered as main income activity                                    |                                                                                                                                                                             |
|                                                              | A9a - Fixed telephone                                                                        |                                                                                                                                                                             |
| A9 – Technologies available                                  | A9b - Mobile telephone connection                                                            |                                                                                                                                                                             |
|                                                              | A9c - Internet access                                                                        |                                                                                                                                                                             |
| Action situations:<br><b>Interactions (I) → Outcomes (O)</b> | I1 – Harvesting                                                                              | I1a - <i>Nacional</i> organic cacao productivity                                                                                                                            |
|                                                              | I2 – Information sharing                                                                     | I2b - Fluidity of information over cocoa market situation                                                                                                                   |
|                                                              |                                                                                              | I2a - Fluidity in cocoa production process between actors and stakeholders                                                                                                  |
|                                                              | I3 – Deliberation processes                                                                  | I3a - Collective deliberation process (Assemblies) in cocoa production issues                                                                                               |
|                                                              | I4 – Conflicts                                                                               | I4a - Conflicts between certified and non-certified producers                                                                                                               |
|                                                              | I5 – Investment activities                                                                   | I5a - Investment activities to improve cocoa production / post-harvest process/ international certification                                                                 |
| I6 – Lobbying activities                                     | I6a - Influence of users over cocoa final price                                              |                                                                                                                                                                             |

|                                                                                                      |                                                                                                                                           |
|------------------------------------------------------------------------------------------------------|-------------------------------------------------------------------------------------------------------------------------------------------|
| I7 – Self-organizing activities                                                                      | I7a - Internal rules for collective management in the cocoa production process; Active search for markets and /or certification processes |
| I8 – Networking activities                                                                           | I8a - Cooperation and partnerships with external actors over cocoa production (NGOs - government)                                         |
| I9 – Monitoring activities                                                                           | I9a - Collective agreements to control cocoa production quality                                                                           |
| I10 – Evaluative activities                                                                          | I10a - Assessment of compliance with certifications guidelines                                                                            |
| O1 – Social performance measures (e.g., efficiency, equity, accountability, sustainability)          | O1a - Vulnerability to external economic impacts                                                                                          |
| O2 – Ecological performance measures (e.g., overharvested, resilience, biodiversity, sustainability) | O2a - Vulnerability to environmental pressures                                                                                            |
| O3 – Externalities to other SESs                                                                     | O3a - Emergence of other activities looking for more incomes that can create stress over other SES.                                       |

---

|                             |                                                 |                                                    |
|-----------------------------|-------------------------------------------------|----------------------------------------------------|
| Related ecosystems<br>(ECO) | <b>ECO1</b> – Climate patterns                  | <b>ECO1a</b>                                       |
|                             | <b>ECO2</b> – Pollution patterns                | <b>ECO2a</b>                                       |
|                             | <b>ECO3</b> – Flows into and out of communities | <b>ECO3a</b> - Cocoa production inputs and outputs |
